## A review on adsorbent parameters for removal of dye products from industrial wastewater

Ali Soltani <sup>a,\*</sup>, Mehdi Faramarzi<sup>b</sup> and Seyed Aboutaleb Mousavi Parsa<sup>a</sup>

<sup>a</sup> Department of Chemical Engineering, Yasooj Branch, Islamic Azad University, Yasooj, Iran

<sup>b</sup> Department of Chemical Engineering, Gachsaran Branch, Islamic Azad University, Gachsaran, Iran

\*Corresponding author. E-mail: alisltn7@gmail.com

<sup>iD</sup> AS, 0000-0001-6375-4713

### ABSTRACT

Industrial effluents are usually one of the major industries polluting the environment and surface water. It is estimated that the worldwide production of dyes is about 70 tons/year. To overcome this problem, innovative processes are suggested for the treatment of industrial effluents containing dyes and heavy metals. The goal of the processes is often to reduce the toxicity of these pollutants in order to meet treatment standards. Recently, great attention has been paid to innovative processes for physical and chemical removal techniques such as adsorption on new adsorbents, biomass adsorption, membrane filtration, irradiation, and electrochemical coagulation. In this study, the application of adsorbents in the adsorption process to remove dye pollutants from industrial effluents has been studied. Factors affecting dye adsorption such as pH, temperature, initial dye concentration, and adsorbent amount are also presented. The obtained results revealed that more than 80% of the dye adsorption on the surface of adsorbents are endothermic processes and more than 95% of the processes obey the pseudo-second-order kinetic model.

**Key words:** adsorbent, adsorption, adsorption isotherm, dye removal, industrial effluent

### HIGHLIGHTS

- Investigation of the influence of different adsorbents and different adsorption process parameters.
- Factors affecting dye adsorption.
- Regenerability of adsorbents in the adsorption process to make the adsorption process more economical.
- Application of adsorbents in the adsorption process to remove dye from industrial effluents.

### GRAPHICAL ABSTRACT

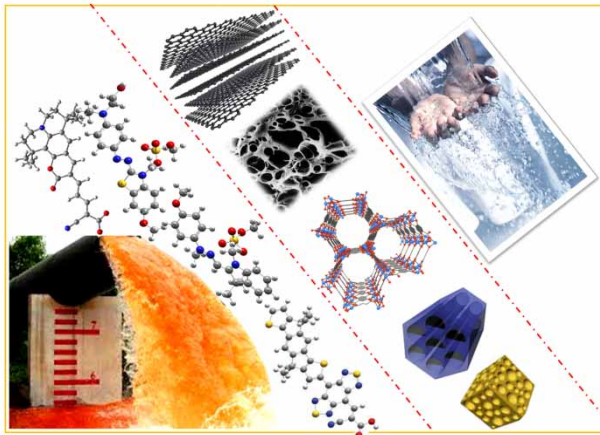

This is an Open Access article distributed under the terms of the Creative Commons Attribution Licence (CC BY 4.0), which permits copying, adaptation and redistribution, provided the original work is properly cited (<http://creativecommons.org/licenses/by/4.0/>).

## 1. INTRODUCTION

In recent years, adsorption processes have shown effective results on water and wastewater treatment technology in different industries. In these techniques, a series of natural or synthesized adsorbents have been used to treat contaminants such as metals, dyes, and pharmaceutical products in solutions (Hajipour *et al.* 2021). These adsorbents can be regenerated or consumed after the adsorption process. Synthetic dyes are widely used in many advanced industries such as various textiles, paper, leather, food process, plastics, cosmetics, printing, and industrial dyes (Benkhaya *et al.* 2020). The entry of synthetic dyes into industrial effluents and their discharge into aqueous solutions has caused considerable environmental issues in recent years (Al-Sakkaf *et al.* 2020). The presence of dye pollutants in water will reduce sunlight penetration and negatively affect the photosynthetic activity (Misra *et al.* 2020). To date, more than 100,000 industrial dyes with an annual production of more than  $7 \times 10^5$  tons/year are known (Adegoke & Bello 2015). Textile industries consume more than 100,000 tons/year dyes, and about 100 tons/year of dye enters the effluent water (Mosbah *et al.* 2019). There is no exact information on the amount of dye released from various processes to the environment. However, scientists have identified the release of actual amounts of artificial colors into the environment as an environmental challenge (Lellis *et al.* 2019; Javidparvar *et al.* 2020). Various methods such as adsorption (Konicki *et al.* 2017), coagulation (Kosaka *et al.* 2018), advanced oxidation (Javaid & Qazi 2019) and separation of membranes and nanosorbents (Karim *et al.* 2014; Abdi *et al.* 2018) have been used to remove dyes from wastewater.

Adsorption is an effective process in advanced wastewater treatment techniques to reduce the effluent risks of high pollutants and minerals (Khulbe & Matsuura 2018). Many textile industries use commercial activated carbon to treat colored effluents (Briton *et al.* 2020). Many researchers have reported the possibility of using cheap adsorbents derived from natural materials, industrial, and agricultural solid waste (Sulyman *et al.* 2017). The use of biosorbents to improve the adsorption capacity has been reported by researchers (Adewuyi 2020). Several groups of dyes are stable molecules resistant to decomposition by light, chemicals, biological, and other factors and are considered mutagens for humans (Badran & Khalaf 2019; Javaid & Qazi 2019). Most dyes are complex organic molecules that require resistance to external agents such as detergents (Julkapli *et al.* 2014). Dye molecules are made up of two components: the dye agent, which is responsible for the color formation, and the enhancer, which is responsible for amplifying the dye agent, its solubility in water, and binding to the surface (Bisht & Lal 2019). Therefore, dye-contaminated wastewater must be treated appropriately before being released into the environment (Basheer 2018). In general, colors can be classified according to their structure, application, the charge of particles, or color in the solution. Table 1 shows the classification of colors based on their different applications (Hou *et al.* 2011; Yu *et al.* 2016).

Base colors have a high color intensity and can be seen in low concentrations (Nelis *et al.* 2019). Complex dyes are generally based on chromium, which is carcinogenic (Chakraborty *et al.* 2020). Azo dyes are toxic due to the presence of toxic amines in the effluents (Sarkar *et al.* 2017). Anthraquinone-based dyes are also the most resistant dyes to decomposition and remain in the effluent for a long time (Ray *et al.* 2020). Reactive dyes are soluble in water, and 5–10% of these dyes enter the dye bath and are present in the colored effluent, which creates serious problems for the environment (Hynes *et al.* 2020). Removal of reactive dyes and their degradability in biological systems using conventional wastewater treatment techniques is low (Dayi *et al.* 2020). For this reason, focusing on specific methods of removing dye from industrial effluents helps to select a treatment system appropriate to the type of pollution. The main purpose and novelty of this review study are to

**Table 1** | Classify different colors based on their application (Hou *et al.* 2011; Yu *et al.* 2016)

| Category | Sub-layer                                                           |
|----------|---------------------------------------------------------------------|
| Acidic   | Wool, nylon, silk, ink, leather, and paper                          |
| Basic    | Ink, paper, polyacrylic and nitrile, processed nylon, and polyester |
| Direct   | Nylon, rayon, paper, leather, and linen                             |
| Disperse | Polyamide, acrylic polyester, acetate, and plastic                  |
| Reactive | Wool, linen, silk, and nylon                                        |
| Sulfur   | Rayon and linen                                                     |
| Vat      | Cotton, wool, and linen                                             |

investigate the application of new and inexpensive adsorbents for the removal of dye compounds from industrial wastewater. In addition, physical and chemical adsorption processes and parameters affecting adsorption capacity are presented. Adsorption kinetics, isotherm models, thermodynamics, and adsorption capacity are collected under different process conditions. Therefore, an overview of the most comprehensive updated information on the adsorption of different colors from aqueous solution by a wide range of adsorbents has been provided in the current work. Over the past two decades, attempts have also been made to use a wide range of adsorbents to analyze color adsorption information (Ali 2013).

## 2. AVAILABLE TECHNOLOGIES FOR DYE REMOVAL

There are currently not many ways to remove dye from the effluents. Despite the availability of many techniques for eliminating dye contaminants from wastewater, such as flocculation, chemical oxidation of membranes, separation processes, electrochemical and aerobic, and microbial anaerobic (Rajasulochana & Preethy 2016; Zaied *et al.* 2020), inherent limitations have been involved by each of these methods (Ghoreishi & Haghghi 2003).

Utilizing biological processes to remove dye from wastewater has grown recently, gaining several research groups' attention. In this method, a new strain of microbe resistant to the microbe contacted the toxic waste that would convert into a less harmful form. The biodegradation mechanism is based on the biotransformation enzymes, which would lead to the biodegradation of recalcitrant compounds in the microbial system. Several enzymes such as tyrosinase, hexane oxidase, demethylase, laccase, or lignin peroxidase were used as the biodegradation agent. However, the degradation of azo dyes by enzymes or a combination of physical methods has gained attention from several biotechnological approaches (Kumar *et al.* 2012).

Physical methods operate based on the mass transfer mechanism and usually consist of straightforward systems to remove dye from wastewater. Ion exchange, irradiation, adsorption, coagulation, and membrane filtration are the conventional physical processes that were used for the separation process. However, among the mentioned methods (chemical, biological, and physical), physical methods are implemented to remove the dye commonly due to ease of use, simple operation conditions, and more efficient processes. Adsorption method has been considered as the very effective method for utilizing in the dye removal process because of several factors, such as low operation cost, reusability of adsorbent, low material consumption, or excellent properties of adsorbent material (e.g., high surface area and high adsorption capacity) (Ghoreishi & Haghghi 2003). Several adsorbents with different features were utilized for the adsorption of dyes, as tabulated in Supplementary Material, Table S2. The pore diameter is also one of the most important features of adsorbent materials that would affect adsorbent selectivity based on the diameter of adsorbed material (Kumar *et al.* 2012).

Various factors affect the way and capacity of the dye adsorption. The most effective of these factors are solution pH, temperature, initial concentration, and amount of adsorbent (Rápó *et al.* 2020). Optimizing these conditions will greatly affect the development of the dye removal process on an industrial scale. Some of the factors affecting color adsorption that have been investigated in most studies are reviewed in the following sections.

### 2.1. Effect of pH

Acidity of the solution is one of the most important factors affecting the adsorbent capacity in wastewater treatment. Adsorption efficiency depends on the pH of the solution because changes in pH lead to changes in the degree of melting properties (Kumar *et al.* 2019). Therefore, pH is mentioned as an important parameter in color adsorption. The adsorption ability and active centers on the surface depend on the zero electric charge point called the surface  $P_{zc}$  (Skwarek *et al.* 2016). This point is directly affected by the used pH solution,  $pH_{pzc}$ , in which surface charge is zero, typically used to quantify the electromagnetic properties of the surface (Jouniaux & Ishido 2012).

The pH value to describe  $P_{zc}$  is only for systems in which  $H^+/OH^-$  ions are predominant. Many researchers have studied the  $P_{zc}$  point of many different adsorbents prepared from agricultural effluents to understand the mechanism of adsorption. The adsorption of cationic dyes at  $pH > pH_{pzc}$  is desirable due to the functional group,  $OH^-$  group, while the adsorption of anionic dyes at  $pH < pH_{pzc}$  is desirable, where the surface is positively charged (Elwakeel *et al.* 2020).

### 2.2. Effect of dye initial concentration

The effect of initial dye concentration is closely related to the dye concentration and the sites present on the adsorbent surface. In general, the percentage of dye removal decreases with increasing initial dye concentration, which leads to a saturation

of adsorption sites on the adsorbent surface (Son *et al.* 2016). On the other hand, increasing the initial concentration of the dye increases the adsorption capacity due to the high driving force of mass transfer in the initial high concentration of dye.

### 2.3. Effect of temperature

Temperature is another important parameter in the physico-chemical adsorption process due to the fact that the amount of adsorbent capacity can be related to the process temperature (Jiang *et al.* 2018). If the amount of adsorption sites increases with increasing temperature, this indicates that the adsorption process is endothermic. This may be due to the increment of the mobility of dye molecules, as the number of active sites for adsorption increases with increasing the process temperature (Wong *et al.* 2020). On the other hand, there are several adsorption processes in which increases in temperature adsorption capacity have declined, indicating the exothermic adsorption process (Belhamdi *et al.* 2016; Peng *et al.* 2020; Romdhane *et al.* 2020). In this kind of adsorption, the adsorption forces between the dye species and the active sites on the adsorbent surface decreased, resulting in a decrease in the adsorption process.

### 2.4. Amount of adsorbent

The amount of adsorbent is an important parameter for determining the adsorbent capacity for a given amount of adsorbent under operating conditions. In general, the percentage of dye removal increases with increasing the amount of adsorbent with increasing the number of adsorption sites on the adsorbent surface. The effect of the amount of adsorbent material presents an idea for the adsorption process, which is economically viable (Salleh *et al.* 2011).

### 2.5. Kinetic study of dye adsorption

Several kinetic models are used in different laboratory conditions to investigate adsorption mechanisms, such as chemical reaction, diffusion control, and mass transfer. The information obtained from adsorption kinetics can be examined to understand the dynamics of adsorption reactions. The study of adsorption kinetics is useful for designing and modeling the process to predict the adsorption rate. The adsorption capacity at all stages of optimization is calculated from the  $q_e$  relation (Equation (1)).

$$q_e = \frac{(C_0 - C_e)V}{M} \quad (1)$$

where in this equation,  $C_0$ ,  $C_e$ ,  $V$ , and  $M$  are initial dye concentration (mg/L), equilibrium dye concentration (mg/L), solution volume (L), and sorbent weight (g), respectively.

Dye removal percentage (color adsorption efficiency) is also obtained from the following equation:

$$R = 100 \times \frac{(C_0 - C_e)}{C_0} \quad (2)$$

Kinetic and thermodynamic adsorption models are widely discussed in the Supplementary Material.

#### 2.5.1. Application of various isotherm models in dye removal

Equilibrium adsorption isotherm models are essential requirements for the design of adsorption systems and the interaction between adsorbent and adsorbent. Models used to analyze equilibrium adsorption data include the Langmuir and Freundlich models (Khayyun & Mseer 2019).

Langmuir is one of the most prominent isotherm models that describe the nonlinear equilibrium between the amount of adsorbed analyte and its free amount in solution at a constant temperature. This model is simple and provides a good description of the experimental behavior in a wide range of working conditions. This isotherm is based on the assumption of monolayer adsorption on an adsorbent with a homogeneous structure that all adsorption sites are the same and equal in energy. The Langmuir relationship is expressed as follows (Mustapha *et al.* 2019):

$$q_e = \frac{q_{\max} k_L C_e}{(1 + k_L C_e)} \quad (3)$$

or in linear form (Equation (4));

$$\frac{C_e}{q_e} = \left( \frac{1}{q_{\max} K_L} \right) + \left( \frac{C_e}{q_{\max}} \right) \quad (4)$$

In Equation (4),  $q_e$  is the amount of adsorbed analyte per unit mass of the adsorbent and  $q_{\max}$  is the maximum amount of adsorption in the adsorbent monolayer in mg/g,  $C_e$  is the equilibrium concentration of the analyte in solution in mg/L, and  $K_L$  is the Langmuir equation constant.

The Freundlich adsorption model (Equation (5)) is an empirical relation which indicates that adsorption takes place in multiple layers (Na 2020).

$$q_e = K_F C_e^{1/n} \quad (5)$$

or in the linear form as follows;

$$\ln q_e = \ln K_F + \left( \frac{1}{n} \right) \ln C_e \quad (6)$$

where  $n$  is a constant related to the heterogeneity of the surface, and its value usually varies in the range of 0–1. The closer value of  $n$  to 1 means the more homogeneous surface.  $K_F$  is the Freundlich constant that is related to the adsorption capacity. The Freundlich model shows that a higher concentration of initial analyte would lead to a higher adsorption rate of nanoparticles.

Hall *et al.* (1966) introduced the dimensionless component  $R_L$ , called the separation coefficient. This component is used to describe the type and shape of the adsorption isotherm. It is expressed as Equation (7), and the relationship of  $R_L$  with the type of Langmuir isotherm is shown in Table 2.

$$R_L = 1 + K_L C_0 \quad (7)$$

where  $C_0$  is the initial adsorbed concentration in solution (mg/L), and  $K_L$  is the Langmuir equation constant. The Langmuir model is obtained by assuming that the adsorption energy is constant for the active positions of the adsorbent surface and does not depend on its coverage.

The Freundlich model assumes that the number of positions in the adsorption action with free energy can be potentially reduced by increasing free energy (Shikuku *et al.* 2018). According to this assumption, with an increasing solute concentration in the solution, the surface concentration never reaches saturation due to high free energy surface sites for adsorption. The value of  $n$  in Equation (5) describes the type of the Freundlich isotherm. The type of relationship is given in Table 3 (Santhy & Selvapathy 2006).

### 3. DISCUSSION

As was mentioned previously, there are many techniques for eliminating dye contaminants from wastewater. All of these different methods of color removal have the advantages and disadvantages as shown in Table 4.

Fenton reaction, electrochemical method, oxidation, photochemical, UV degradation method, ozonation, or advanced oxidation process are typical processes used for dye removal based on the chemical method. Chemical methods are not

**Table 2** | Correlation of  $R_L$  with the Langmuir isotherm

| Isotherm situation | $R_L$         |
|--------------------|---------------|
| Undesirable        | $R_L > 1$     |
| Linear             | $R_L = 1$     |
| Desired            | $0 < R_L < 1$ |
| Reversible         | $R_L = 0$     |

**Table 3** | Correlation  $n$  with the Freundlich isotherm

| Isotherm situation | $n$     |
|--------------------|---------|
| Undesirable        | $n > 1$ |
| Linear             | $n = 1$ |
| Desired            | $n < 1$ |

**Table 4** | An overview of the advantages and disadvantages of dye removal methods (Robinson *et al.* 2001; Salleh *et al.* 2011)

| Method                                        | Advantages                                                                                  | Disadvantages                                                 |
|-----------------------------------------------|---------------------------------------------------------------------------------------------|---------------------------------------------------------------|
| Chemical purification                         |                                                                                             |                                                               |
| Oxidation                                     | Ease of use                                                                                 | Requires activation agent                                     |
| H <sub>2</sub> O <sub>2</sub> + Fe (II) salts | Suitable for removal                                                                        | Sludge production                                             |
| Ozonation                                     | It can be used in the form of ozone and does not increase the volume of sludge and effluent | Short half-life (20 min)                                      |
| Biological treatment                          |                                                                                             |                                                               |
| Decolorization by white-rot fungus            | Enzymatic removal of dyes is performed                                                      | Enzyme production is unreliable                               |
| Microbial mixture                             | Removal in 24–30 h                                                                          | Azo dyes are not easily metabolized under aerobic conditions  |
| Adsorption by living or dead biomass          | Specific colors have a special tendency to bind to microbial species                        | No effect for all colors                                      |
| Anaerobic bioremediation of textile dyes      | Makes it possible to remove azo and water-soluble dyes                                      | Anaerobic decomposition produces methane and hydrogen sulfide |
| Physical purification                         |                                                                                             |                                                               |
| Adsorption with carbon                        | Perfect removal of a wide range of colors                                                   | High cost                                                     |
| Membrane filtration                           | All of dyes removed                                                                         | Production of concentrated sludge                             |
| Ion exchange                                  | Rehabilitation: no loss of adsorbent                                                        | No effect for all colors                                      |
| Irradiation                                   | Effective oxidation on a laboratory scale                                                   | Requires high levels of soluble O <sub>2</sub>                |
| Electrochemical coagulation                   | Economically flexible                                                                       | High volume of sludge production                              |

commercially favorable due to specific equipment and high electrical energy compared to physical and biological methods. Besides, utilizing the chemical techniques can lead to additional environmental problems due to the consumption of huge amounts of chemicals and releasing of probable toxic material due to chemical reactions (Katheresan *et al.* 2018).

As typical examples, several works studied dye removal, such as low-cost adsorbents for the removal of organic pollutants from industrial wastewater by Ali *et al.* (2012), adsorption of cationic and anionic dyes by agricultural solid wastes by Salleh *et al.* (2011), unconventional low-cost adsorbents for dye removal by Crini (2006), decolorization of effluent dye by biosorbents by Srinivasan & Viraraghavan (2010), biodegradation of industrial dyes by Ali (2010), and adsorption of aqueous methylene on low-cost adsorbents by Rafatullah *et al.* (2010). However, all are shared only with a specific system and have nothing to do with updated information.

The effects of pH on the dye adsorption from different solutions are given in Table 5.

Chowdhury *et al.* (2011) studied the effect of pH of the solution on the adsorption of four green colors by *Ananas comosus* leaf powder. They found that at a pH range of 2–10, the maximum dye removal rate was at pH = 10. Dawood & Sen (2012) studied the effect of pH on the adsorption of red Congo dye by pine cones and found that the maximum adsorption occurs at pH = 3.5. Ibrahim *et al.* (2010) studied the adsorption of RB4 dye by modified barley straw. They found that the complete removal of RB4 occurred at pH = 3, and with increasing pH, the amount of adsorption decreased to less than 50%. Yagub *et al.* (2012) reported that cationic MB's adsorption on pine leaves increases with pH increasing.



**Table 5** | Results of various studies to determine the effect of pH on the adsorption process

| Adsorbent                      | Dye            | pH range | Removal range (%) | References                 |
|--------------------------------|----------------|----------|-------------------|----------------------------|
| Modified alumina               | Crystal violet | 2.6–10.8 | 20–80             | Adak <i>et al.</i> (2005)  |
| Activated carbon               | Methylene blue | 2–11     | Additive          | Kannan & Sundaram (2001)   |
| Kaolinite                      | Crystal violet | 2–7      | 65–95             | Nandi <i>et al.</i> (2008) |
| Bentonite                      | Blue acid 193  | 1.5–11   | Decrease          | Sari <i>et al.</i> (2019)  |
| Fly ash                        | Methylene blue | 2–8      | 36–45             | Kumar <i>et al.</i> (2005) |
| Fe <sub>2</sub> O <sub>3</sub> | Red acid 27    | 1.5–10.5 | 27–98             | Nassar (2010)              |
| Tobacco                        | Methylene blue | 2–7.93   | 60–81             | Ghosh & Reddy (2013)       |
| Modified sawdust               | Methylene blue | 2–11     | Additive          | Zou <i>et al.</i> (2013)   |

According to Table 5, almost all of the adsorbent performance in dye removal has been enhanced by increasing pH. Typically, crystal violet removal utilizing modified alumina has 60% increased by increasing pH from 2.6 to 10.8, while this manner is almost repeated for other adsorbents. The increase of H<sup>+</sup> ion concentration may lead to a higher protonation degree of the adsorbent surface, which leads to an increase in the electrostatic interaction between the adsorbent and the dye with a negative charge. A higher interaction between the dye molecule and the adsorbent surface leads to a higher adsorption rate. However, increasing OH<sup>-</sup> group concentration on the adsorbent surface (deprotonated surface) in a high pH would lead to a lower adsorption rate (Wong *et al.* 2020), leading to a more inferior adsorption rate dye in high pH conditions. The pH variation may affect the transport of dye molecules to the surface of the adsorbent, which can be considered as the rate-limiting stage in the dye adsorption process (Saratale *et al.* 2011).

As can be seen in Table 6, the increment of the initial dye concentration leads to an increase in dye removal by implementing all presented adsorbents, while as a typical example, methylene blue removal over kaolinite, pine leaves, or mango kernel powder has increased from 62, 41, and 92.5% to 90, 96, and 99%, respectively. The presence of more dye initial concentrations leads to the increase of dye molecules in constant adsorbent amounts, resulting in higher dye removal and adsorption capacity. Moreover, due to the saturation of adsorbent sites, the remained dye molecules in the solution do not adsorb on the adsorbent. Zhang *et al.* (2012) studied the adsorption of methyl orange by chitosan/alumina. The results of their study showed that when the concentration of methyl orange increased from 20 to 400 mg/L, the percentage of dye removal decreased from 99.53 to 83.55%. Yagub *et al.* (2012) studied the effect of initial dye concentration on the adsorption of methylene (MB) blue from pine trees. They found that the color decreased from 96.5 to 40.9% in 240 min.

However, based on the data as shown in Table 7, adsorbents such as kaolinite or Na-bentonite exhibit exothermic adsorption, while other adsorbents in Table 7 show an endothermic process. Presented adsorption results for kaolinite and Na-bentonite indicate a slight adsorption decline of Red Congo by increasing temperature from 279 to 333 K, so must a low-temperature condition be considered for Red Congo adsorption on the kaolinite and Na-bentonite. Additionally,

**Table 6** | Results of various studies in determining the effect of initial dye concentration on the adsorption process

| Adsorbent           | Dye                | Concentration range (mg·L <sup>-1</sup> ) | Removal range (%) | References                                                      |
|---------------------|--------------------|-------------------------------------------|-------------------|-----------------------------------------------------------------|
| Kaolinite           | Methylene blue     | 10–40                                     | 62–90             | Motamedi <i>et al.</i> (2011)                                   |
| Fly ash             | Red Congo          | 5–30                                      | 84–99             | Mall <i>et al.</i> (2005)                                       |
| Red clay            | Purple acid        | 10–40                                     | 12.52–26.2        | Namasivayam <i>et al.</i> (2001)                                |
| Activated carbon    | Ariochrome block T | 30–150                                    | 10–45             | Luna <i>et al.</i> (2013)                                       |
| Mango kernel powder | Methylene blue     | 50–250                                    | 92.5–99           | Senthil Kumar <i>et al.</i> (2013); Anitha <i>et al.</i> (2016) |
| Pine leaves         | Methylene blue     | 10–90                                     | 41–96             | Ramaraju <i>et al.</i> (2013)                                   |
| Rice husk           | Green Malachite    | 10–30                                     | 71–82.5           | Kahraman <i>et al.</i> (2011)                                   |
| Apricot kernels     | Black Astrazone    | 50–500                                    | 62–91             | Argun <i>et al.</i> (2008)                                      |

**Table 7** | Results of various studies to determine the effect of temperature on dye adsorption

| Adsorbent              | Dye              | Temperature range (K) | Process     | References                    |
|------------------------|------------------|-----------------------|-------------|-------------------------------|
| Kaolinite              | Red Congo        | 279–333               | Exothermic  | Vimonses <i>et al.</i> (2009) |
| Na-Bentonite           | Red Congo        | 279–333               | Exothermic  | Vimonses <i>et al.</i> (2009) |
| Pine leaves            | Methylene blue   | 313–333               | Endothermic | Yagub <i>et al.</i> (2012)    |
| Activated bamboo waste | Reactive black 5 | 303–323               | Endothermic | Ahmad <i>et al.</i> (2013)    |
| Residual sludge        | Green Naphthol   | 303–323               | Endothermic | Attallah <i>et al.</i> (2012) |

exothermic adsorption of Red Congo over kaolinites and Na-bentonite was approved by the exhibited negative enthalpy ( $\Delta H$ ) values from  $-15.25 \text{ KJ}\cdot\text{mol}^{-1}$  at 279 K to  $-15.532 \text{ KJ}\cdot\text{mol}^{-1}$  at 333 K. On the other hand, other adsorbents exhibit an endothermic adsorption process, in which adsorption capacities have increased by an increase in temperature for pine leaves, activated bamboo water, and residual sludge adsorbents. Typically, methylene blue adsorption over pine leaves has grown at a higher temperature, indicating endothermic adsorption of methylene blue over pine leaves. Besides, exhibited positive enthalpy ( $15.29 \text{ KJ}\cdot\text{mol}^{-1}$ ) confirms the endothermic process of methylene blue.

According to Table 8, in the presence of higher concentrations of adsorbents the dye removal was increased. By increasing the pine cone adsorbent amount from 0.01 to 0.03 g, Red Congo dye removal has grown from 13.45 to 18.96, while this manner was observed for all mentioned adsorbents. As discussed above, the higher dosage of adsorbent would lead to higher vacant sites availability, so more dye molecules can contact adsorbent active sites that lead to higher dye removal. Additionally, by an increase in the amount of adsorbent, a higher surface area (micropore or mesopore structures) may be available. This higher surface area enables the adsorbent to operate with a higher capacity in dye adsorption (Mall *et al.* 2005).

It is important to regenerate the adsorbent and reuse it in the adsorption process to make the adsorption process more economical. Almost all of the adsorbents have been regenerated by chemical agents such as NaOH or HCl. In most cases, the regenerated adsorbent was suitable for the color adsorption process for at least three cycles; however, the reusability of the adsorbents may decline after several regeneration cycles. According to Table 9, all mentioned adsorbents show

**Table 8** | Results of studies performed to determine the effect of adsorbent on removal percentage

| Adsorbent       | Dye             | Amount of adsorbent                | Removal percentage (%) | References                   |
|-----------------|-----------------|------------------------------------|------------------------|------------------------------|
| Pine cone       | Red Congo       | 0.01–0.03 mg                       | 13.45–18.96            | Dawood & Sen (2012)          |
| Fly ash         | Methylene blue  | 8,000–20,000 mg                    | 45–96                  | Kumar <i>et al.</i> (2005)   |
| Tea residual    | Basic yellow    | $2.20 \text{ g}\cdot\text{L}^{-1}$ | 19–60                  | Khosla <i>et al.</i> (2013)  |
| Orange peel     | Purple acid     | 50–600 mg/50 mL                    | 15–98                  | Sivaraj <i>et al.</i> (2001) |
| Rice husk       | Orange reactive | 20–80 mg                           | 21.7–56.2              | Ong <i>et al.</i> (2007)     |
| Refined sawdust | Green Malachite | 200–1,000 mg/100 mL                | 18.60–86.90            | Garg <i>et al.</i> (2003)    |

**Table 9** | Regeneration of adsorbents implemented for dye removal

| Adsorbent                                                                 | Dye name          | Regeneration agent | Reuse cycle | References                         |
|---------------------------------------------------------------------------|-------------------|--------------------|-------------|------------------------------------|
| Activated pinecone                                                        | Alizarin Red S    | NaOH               | 4           | Bhomick <i>et al.</i> (2018)       |
| Magnetic rice husk                                                        | Methylene blue    | NaOH               | 10          | Lawagon & Amon (2019)              |
| Chitosan                                                                  | Reactive black 5  | NaOH               | 5           | Vakili <i>et al.</i> (2019)        |
| Chitosan/bentonite/CTAB                                                   | Weak acid scarlet | NaOH               | 3           | Vakili <i>et al.</i> (2019)        |
| Activated bentonite/alginate                                              | Methylene blue    | HCl                | 6           | Aichour & Zaghouane-Boudiaf (2020) |
| Fe <sub>3</sub> O <sub>4</sub> /activated charcoal/-cyclodextrin/alginate | Methylene blue    | HCl                | 5           | Yadav <i>et al.</i> (2020)         |
| Modified activated carbon                                                 | Methylene blue    | HCl                | 4           | Naushad <i>et al.</i> (2019)       |



proper reusability after that regenerated by a chemical treatment (e.g., HCl or NaOH). However, adsorbent activity may decline after several cycles of regeneration due to part structure collapse or remaining adsorbed molecule in adsorbent structure (Fan *et al.* 2018).

#### 4. CONCLUSION AND FUTURE PERSPECTIVES

In this study, a series of adsorbents such as industrial solids, agricultural by-products, activated carbon, activated carbon-based biomasses, nano-adsorbents, mineral oxides, and mineral soil are reviewed to remove dye or contaminants from aqueous solutions. Adsorbents should be available, cost-effective, porous, recyclable, and have many active sites on their structure. In this way, future studies could focus on the adsorbents with good adsorption/desorption performance, recyclability, and cost-effectiveness. Furthermore, finding cost-effective strategies in the fields of storage and reusability of used adsorbents are other important issues for the future studies. In this way, the safe and economical disposal/reuse of used adsorbents should be considered in future investigations. It is possible to use raw materials and refining materials instead of expensive commercial activated carbon to remove dye from aqueous solutions. In this review study, a large number of articles have been reviewed, and as can be seen, the mechanism and methods of adsorption for the removal of contaminants by the adsorbent depend on the conditions of experimental physical and chemical data such as pH, initial contaminant concentration, adsorbent concentration, and temperature. In this review study, it is found that the Langmuir and Freundlich adsorption isotherm models for measuring the adsorption capacity of adsorbents are different, and the kinetic data for the adsorption of color pollutants usually follow the pseudo-second-order kinetic model.

#### CONFLICT OF INTEREST

The authors declare that they have no conflict of interest.

#### FUNDING

This research did not receive any specific grant from funding agencies in the public, commercial, or not-for-profit sectors.

#### DATA AVAILABILITY STATEMENT

All relevant data are included in the paper or its Supplementary Information.

#### REFERENCES

- Abdi, G., Alizadeh, A., Zinadini, S. & Moradi, G. 2018 Removal of dye and heavy metal ion using a novel synthetic polyethersulfone nanofiltration membrane modified by magnetic graphene oxide/metformin hybrid. *Journal of Membrane Science* **552**, 326–335. <https://doi.org/10.1016/J.MEMSCI.2018.02.018>.
- Adak, A., Bandyopadhyay, M. & Pal, A. 2005 Removal of crystal violet dye from wastewater by surfactant-modified alumina. *Separation and Purification Technology* **44** (2), 139–144. <https://doi.org/10.1016/j.seppur.2005.01.002>.
- Adegoke, K. A. & Bello, O. S. 2015 Dye sequestration using agricultural wastes as adsorbents. *Water Resources and Industry* **12**, 8–24. <https://doi.org/10.1016/j.wri.2015.09.002>.
- Adewuyi, A. 2020 Chemically modified biosorbents and their role in the removal of emerging pharmaceutical waste in the water system. *Water* **12** (6), 1551. <https://doi.org/10.3390/w12061551>.
- Ahmad, A. A., Idris, A. & Hameed, B. H. 2013 Organic Dye adsorption on activated carbon derived from solid waste. *Desalination and Water Treatment* **51** (13–15), 2554–2563. <https://doi.org/10.1080/19443994.2012.749019>.
- Aichour, A. & Zaghouane-Boudiaf, H. 2020 Synthesis and characterization of hybrid activated bentonite/alginate composite to improve its effective elimination of dyes stuff from wastewater. *Applied Water Science* **10** (6). <https://doi.org/10.1007/s13201-020-01232-0>.
- Ali, H. 2010 Biodegradation of synthetic dyes – a review. *Water, Air, & Soil Pollution* **213** (1–4), 251–273. <https://doi.org/10.1007/s11270-010-0382-4>.
- Ali, I. 2013 Water treatment by adsorption columns: evaluation at ground level. *Separation & Purification Reviews* **43** (3), 175–205. <https://doi.org/10.1080/15422119.2012.748671>.
- Ali, I., Asim, M. & Khan, T. A. 2012 Low cost adsorbents for the removal of organic pollutants from wastewater. *Journal of Environmental Management* **113**, 170–183. <https://doi.org/10.1016/j.jenvman.2012.08.028>.
- Al-Sakkaf, B. M., Nasreen, S. & Ejaz, N. 2020 Degradation pattern of textile effluent by using bio and sono chemical reactor. *Journal of Chemistry* **2020**, 1–13. <https://doi.org/10.1155/2020/8965627>.

- Anitha, T., Senthil Kumar, P., Sathish Kumar, K., Sriram, K. & Ahmed, J. F. 2016 Biosorption of lead(II) ions onto nano-sized chitosan particle blended polyvinyl alcohol (PVA): adsorption isotherms, kinetics and equilibrium studies. *Desalination and Water Treatment* **57** (29), 13711–13721. doi:10.1080/19443994.2015.1061951.
- Argun, M. E., Dursun, S., Karatas, M. & Gürü, M. 2008 Activation of pine cone using Fenton oxidation for Cd(II) and Pb(II) removal. *Bioresource Technology* **99** (18), 8691–8698. https://doi.org/10.1016/j.biortech.2008.04.014.
- Attallah, M. F., Ahmed, I. M. & Hamed, M. M. 2012 Treatment of industrial wastewater containing Congo Red and Naphthol Green B using low-cost adsorbent. *Environmental Science and Pollution Research* **20** (2), 1106–1116. https://doi.org/10.1007/s11356-012-0947-4.
- Badran, I. & Khalaf, R. 2019 Adsorptive removal of alizarin dye from wastewater using maghemite nanoadsorbents. *Separation Science and Technology* **55** (14), 2433–2448. https://doi.org/10.1080/01496395.2019.1634731.
- Basheer, A. A. 2018 Chemical chiral pollution: impact on the society and science and need of the regulations in the 21st century. *Chirality* **30** (4), 402–406. https://doi.org/10.1002/chir.22808.
- Belhamdi, B., Merzougui, Z., Trari, M. & Addoun, A. 2016 A kinetic, equilibrium and thermodynamic study of L-phenylalanine adsorption using activated carbon based on agricultural waste (date stones). *Journal of Applied Research and Technology* **14** (5), 354–366. https://doi.org/10.1016/j.jart.2016.08.004.
- Benkhaya, S., M'rabet, S. & Harfi, A. E. 2020 Classifications, properties, recent synthesis and applications of azo dyes. *Heliyon* **6** (1), e03271. https://doi.org/10.1016/j.heliyon.2020.e03271.
- Bhomick, P. C., Supong, A., Baruah, M., Pongener, C. & Sinha, D. 2018 Pine cone biomass as an efficient precursor for the synthesis of activated biocarbon for adsorption of anionic dye from aqueous solution: isotherm, kinetic, thermodynamic and regeneration studies. *Sustainable Chemistry and Pharmacy* **10**, 41–49. https://doi.org/10.1016/j.scp.2018.09.001.
- Bisht, V. & Lal, B. 2019 Exploration of performance kinetics and mechanism of action of a potential novel bioflocculant BF-VB2 on clay and dye wastewater flocculation. *Frontiers in Microbiology* **10**, 1288. https://doi.org/10.3389/fmicb.2019.01288.
- Briton, B. G. H., Yao, B. K., Richardson, Y., Duclaux, L., Reinert, L. & Soneda, Y. 2020 Optimization by using response surface methodology of the preparation from plantain spike of a micro-/mesoporous activated carbon designed for removal of dyes in aqueous solution. *Arabian Journal for Science and Engineering* **45** (9), 7231–7245. https://doi.org/10.1007/s13369-020-04390-0.
- Chakraborty, R., Asthana, A., Singh, A. K., Jain, B. & Susan, A. B. H. 2020 Adsorption of heavy metal ions by various low-cost adsorbents: a review. *International Journal of Environmental Analytical Chemistry*, 1–38. https://doi.org/10.1080/03067319.2020.1722811.
- Chowdhury, S., Chakraborty, S. & Saha, P. 2011 Biosorption of Basic Green 4 from aqueous solution by *Ananas comosus* (Pineapple) leaf powder. *Colloids and Surfaces B: Biointerfaces* **84** (2), 520–527. https://doi.org/10.1016/j.colsurfb.2011.02.009.
- Crini, G. 2006 Non-conventional low-cost adsorbents for dye removal: a review. *Bioresource Technology* **97** (9), 1061–1085. https://doi.org/10.1016/j.biortech.2005.05.001.
- Dawood, S. & Sen, T. K. 2012 Removal of anionic dye Congo Red from aqueous solution by raw pine and acid-treated pine cone powder as adsorbent: equilibrium, thermodynamic, kinetics, mechanism and process design. *Water Research* **46** (6), 1933–1946. https://doi.org/10.1016/j.watres.2012.01.009.
- Dayi, B., Onac, C., Kaya, A., Akdogan, H. A. & Rodriguez-Couto, S. 2020 New type biomembrane: transport and biodegradation of reactive textile dye. *ACS Omega* **5** (17), 9813–9819. https://doi.org/10.1021/acsomega.9b04433.
- Elwakeel, K. Z., Elgarahy, A. M., Elshoubaky, G. A. & Mohammad, S. H. 2020 Microwave assist sorption of crystal violet and Congo Red dyes onto amphoteric sorbent based on upcycled sepia shells. *Journal of Environmental Health Science & Engineering* **18** (1), 35–50. https://doi.org/10.1007/s40201-019-00435-1.
- Fan, B.-G., Jia, L., Wang, Y.-L., Zhao, R., Mei, X.-S., Liu, Y.-Y. & Jin, Y. 2018 Study on adsorption mechanism and failure characteristics of CO<sub>2</sub> adsorption by potassium-based adsorbents with different supports. *Materials* **11** (12), 2424. https://doi.org/10.3390/ma11122424.
- Garg, V. K., Gupta, R., Yadav, A. B. & Kumar, R. 2003 Dye removal from aqueous solution by adsorption on treated sawdust. *Bioresource Technology* **89** (2), 121–124. https://doi.org/10.1016/s0960-8524(03)00058-0.
- Ghoreishi, S. M. & Haghighi, R. 2003 Chemical catalytic reaction and biological oxidation for treatment of non-biodegradable textile effluent. *Chemical Engineering Journal* **95** (1–3), 163–169. https://doi.org/10.1016/s1385-8947(03)00100-1.
- Ghosh, R. K. & Damodar Reddy, D. 2013 Tobacco stem ash as an adsorbent for removal of methylene blue from aqueous solution: equilibrium, kinetics, and mechanism of adsorption. *Water, Air, & Soil Pollution* **224** (6). https://doi.org/10.1007/s11270-013-1582-5.
- Hajipour, F., Asad, S., Amoozegar, M. A., Javidparvar, A. A., Tang, J., Zhong, H. & Khajeh, K. 2021 Developing a fluorescent hybrid nanobiosensor based on quantum dots and azoreductase enzyme for methyl red monitoring. *Iranian Biomedical Journal* **25** (1). https://doi.org/10.29252/ibj.25.1.8.
- Hall, K. R., Eagleton, L. C., Acrivos, A. & Vermeulen, T. 1966 Pore- and solid-diffusion kinetics in fixed-bed adsorption under constant-pattern conditions. *Industrial & Engineering Chemistry Fundamentals* **5** (2), 212–223. https://doi.org/10.1021/i160018a011.
- Hou, M.-F., Liao, L., Zhang, W.-D., Tang, X.-Y., Wan, H.-F. & Yin, G.-C. 2011 Degradation of rhodamine B by Fe(0)-based Fenton process with H<sub>2</sub>O<sub>2</sub>. *Chemosphere* **83** (9), 1279–1283. https://doi.org/10.1016/j.chemosphere.2011.03.005.
- Hynes, N. R. J., Senthil Kumar, J., Kamyab, H., Angela Jennifa Sujana, J., Al-Khashman, O. A., Kuslu, Y., Ene, A. & Suresh Kumar, B. 2020 Modern enabling techniques and adsorbents based dye removal with sustainability concerns in textile industrial sector – a comprehensive review. *Journal of Cleaner Production* **272**, 122636. https://doi.org/10.1016/j.jclepro.2020.122636.
- Ibrahim, S., Fatimah, I., Ang, H.-M. & Wang, S. 2010 Adsorption of anionic dyes in aqueous solution using chemically modified barley straw. *Water Science and Technology* **62** (5), 1177–1182. https://doi.org/10.2166/wst.2010.388.

- Javaid, R. & Qazi, U. Y. 2019 Catalytic oxidation process for the degradation of synthetic dyes: an overview. *International Journal of Environmental Research and Public Health* **16** (11), 2066. <https://doi.org/10.3390/ijerph16112066>.
- Javidparvar, A. A., Naderi, R. & Ramezanzadeh, B. 2020 Non-covalently surface modification of graphene oxide nanosheets and its role in the enhancement of the epoxy-based coatings' physical properties. *Colloids and Surfaces A: Physicochemical and Engineering Aspects* **602**, 125061. <https://doi.org/10.1016/J.COLSURFA.2020.125061>.
- Jiang, L.-l., Yu, H.-T., Pei, L.-f. & Hou, X.-g. 2018 The effect of temperatures on the synergistic effect between a magnetic field and functionalized graphene oxide-carbon nanotube composite for Pb<sup>2+</sup> and phenol adsorption. *Journal of Nanomaterials* **2018**, 1–13. <https://doi.org/10.1155/2018/9167938>.
- Jouniaux, L. & Ishido, T. 2012 Electrokinetics in earth sciences: a tutorial. *International Journal of Geophysics* **2012**, 1–16. <https://doi.org/10.1155/2012/286107>.
- Julkapli, M., Nurhidayatullaili, S. B. & Hamid, S. B. A. 2014 Recent advances in heterogeneous photocatalytic decolorization of synthetic dyes. *The Scientific World Journal* **2014**, 692307. <https://doi.org/10.1155/2014/692307>.
- Kahraman, S., Yalcin, P. & Kahraman, H. 2011 The evaluation of low-cost biosorbents for removal of an azo dye from aqueous solution. *Water and Environment Journal* **26** (3), 399–404. <https://doi.org/10.1111/j.1747-6593.2011.00300.x>.
- Kannan, N. & Sundaram, M. M. 2001 Kinetics and mechanism of removal of methylene blue by adsorption on various carbons – a comparative study. *Dyes and Pigments* **51** (1), 25–40. [https://doi.org/10.1016/s0143-7208\(01\)00056-0](https://doi.org/10.1016/s0143-7208(01)00056-0).
- Karim, Z., Mathew, A. P., Grahn, M., Mouzon, J. & Oksman, K. 2014 Nanoporous membranes with cellulose nanocrystals as functional entity in chitosan: removal of dyes from water. *Carbohydrate Polymers* **112**, 668–676. <https://doi.org/10.1016/J.CARBPOL.2014.06.048>.
- Katheresan, V., Kansedo, J. & Lau, S. Y. 2018 Efficiency of various recent wastewater dye removal methods: a review. *Journal of Environmental Chemical Engineering* **6** (4), 4676–4697. <https://doi.org/10.1016/j.jece.2018.06.060>.
- Khayyun, T. S. & Mseer, A. H. 2019 Comparison of the experimental results with the Langmuir and Freundlich models for copper removal on limestone adsorbent. *Applied Water Science* **9** (8). <https://doi.org/10.1007/s13201-019-1061-2>.
- Khosla, E., Kaur, S. & Dave, P. N. 2013 Tea waste as adsorbent for ionic dyes. *Desalination and Water Treatment* **51** (34–36), 6552–6561. <https://doi.org/10.1080/19443994.2013.791776>.
- Khulbe, K. C. & Matsuura, T. 2018 Removal of heavy metals and pollutants by membrane adsorption techniques. *Applied Water Science* **8** (1). <https://doi.org/10.1007/s13201-018-0661-6>.
- Konicki, W., Aleksandrak, M., Moszyński, D. & Mijowska, E. 2017 Adsorption of anionic azo-dyes from aqueous solutions onto graphene oxide: equilibrium, kinetic and thermodynamic studies. *Journal of Colloid and Interface Science* **496**, 188–200. <https://doi.org/10.1016/J.JCIS.2017.02.031>.
- Kosaka, K., Iwatani, A., Takeichi, Y., Yoshikawa, Y., Ohkubo, K. & Akiba, M. 2018 Removal of haloacetamides and their precursors at water purification plants applying ozone/biological activated carbon treatment. *Chemosphere* **198**, 68–74. <https://doi.org/10.1016/J.CHEMOSPHERE.2018.01.093>.
- Kumar, K. V., Ramamurthi, V. & Sivanesan, S. 2005 Modeling the mechanism involved during the sorption of methylene blue onto fly ash. *Journal of Colloid and Interface Science* **284** (1), 14–21. <https://doi.org/10.1016/j.jcis.2004.09.063>.
- Kumar, P., Agnihotri, R., Wasewar, K. L., Uslu, H. & Yoo, C. 2012 Status of adsorptive removal of dye from textile industry effluent. *Desalination and Water Treatment* **50** (1–3), 226–244. <https://doi.org/10.1080/19443994.2012.719472>.
- Kumar, H., Maurya, K. L., Gehlaut, A. K., Singh, D., Maken, S., Gaur, A. & Kamsonlian, S. 2019 Adsorptive removal of chromium(VI) from aqueous solution using binary bio-polymeric beads made from bagasse. *Applied Water Science* **10**, 1. <https://doi.org/10.1007/s13201-019-1101-y>.
- Lawagon, C. P. & Amon, R. E. C. 2019 Magnetic rice husk Ash 'cleanser' as efficient methylene blue adsorbent. *Environmental Engineering Research* **25** (5), 685–692. <https://doi.org/10.4491/eer.2019.287>.
- Lellis, B., Fávoro-Polonio, C. Z., Pamphile, J. A. & Polonio, J. C. 2019 Effects of textile dyes on health and the environment and bioremediation potential of living organisms. *Biotechnology Research and Innovation* **3** (2), 275–290. <https://doi.org/10.1016/j.biori.2019.09.001>.
- Luna, M. D. G. d., Flores, E. D., Genuino, D. A. D., Futralan, C. M. & Wan, M.-W. 2013 Adsorption of Eriochrome Black T (EBT) dye using activated carbon prepared from waste rice hulls – optimization, isotherm and kinetic studies. *Journal of the Taiwan Institute of Chemical Engineers* **44** (4), 646–653. <https://doi.org/10.1016/j.jtice.2013.01.010>.
- Mall, I. D., Srivastava, V. C., Agarwal, N. K. & Mishra, I. M. 2005 Removal of Congo Red from aqueous solution by bagasse fly ash and activated carbon: kinetic study and equilibrium isotherm analyses. *Chemosphere* **61** (4), 492–501. <https://doi.org/10.1016/j.chemosphere.2005.03.065>.
- Misra, M., Akansha, K., Sachan, A. & Sachan, S. G. 2020 Removal of dyes from industrial effluents by application of combined biological and physicochemical treatment approaches. In: *Combined Application of Physico-Chemical & Microbiological Processes for Industrial Effluent Treatment Plant*. Springer, Singapore. [https://doi.org/10.1007/978-981-15-0497-6\\_17](https://doi.org/10.1007/978-981-15-0497-6_17).
- Mosbah, A., Chouchane, H., Abdelwahed, S., Redissi, A., Hamdi, M., Kouidhi, S., Neifar, M., Masmoudi, A. S., Cherif, A. & Mnif, W. 2019 Peptides fixing industrial textile dyes: a new biochemical method in wastewater treatment. *Journal of Chemistry* **2019**, 1–7. <https://doi.org/10.1155/2019/5081807>.
- Motamedi, M., Tehrani-Bagha, A. R. & Mahdavian, M. 2011 A comparative study on the electrochemical behavior of mild steel in sulfamic acid solution in the presence of monomeric and gemini surfactants. *Electrochimica Acta* **58**, 488–496. <https://doi.org/10.1016/j.electacta.2011.09.079>.



- Mustapha, S., Shuaib, D. T., Ndamitso, M. M., Etsuyankpa, M. B., Sumaila, A., Mohammed, U. M. & Nasirudeen, M. B. 2019 Adsorption isotherm, kinetic and thermodynamic studies for the removal of Pb(II), Cd(II), Zn(II) and Cu(II) ions from aqueous solutions using *Albizia lebeck* pods. *Applied Water Science* **9** (6). <https://doi.org/10.1007/s13201-019-1021-x>.
- Na, C. 2020 Size-controlled capacity and isocapacity concentration in Freundlich adsorption. *ACS Omega* **5** (22), 13130–13135. <https://doi.org/10.1021/acsomega.0c01144>.
- Namasivayam, C., Yamuna, R. & Arasi, D. 2001 Removal of acid violet from wastewater by adsorption on waste Red Mud. *Environmental Geology* **41** (3–4), 269–273. <https://doi.org/10.1007/s002540100411>.
- Nandi, B. K., Goswami, A., Das, A. K., Mondal, B. & Purkait, M. K. 2008 Kinetic and equilibrium studies on the adsorption of crystal violet dye using kaolin as an adsorbent. *Separation Science and Technology* **43** (6), 1382–1403. <https://doi.org/10.1080/01496390701885331>.
- Nassar, N. N. 2010 Kinetics, mechanistic, equilibrium, and thermodynamic studies on the adsorption of acid red dye from wastewater by  $\gamma\text{-Fe}_2\text{O}_3$  nano-adsorbents. *Separation Science and Technology* **45** (8), 1092–1103. <https://doi.org/10.1080/01496391003696921>.
- Naushad, M., Alqadami, A. A., AlOthman, Z. A., Alsohaimi, I. H., Algamdi, M. S. & Aldawsari, A. M. 2019 Adsorption kinetics, isotherm and reusability studies for the removal of cationic Dye from aqueous medium using arginine modified activated carbon. *Journal of Molecular Liquids* **293**, 111442. <https://doi.org/10.1016/j.molliq.2019.111442>.
- Nelis, J. L. D., Bura, L., Zhao, Y., Burkin, K. M., Rafferty, K., Elliott, C. T. & Campbell, K. 2019 The efficiency of color space channels to quantify color and color intensity change in liquids, PH strips, and lateral flow assays with smartphones. *Sensors* **19** (23), 5104. <https://doi.org/10.3390/s19235104>.
- Ong, S. T., Lee, C. K. & Zainal, Z. 2007 Removal of basic and reactive dyes using ethylenediamine modified rice hull. *Bioresource Technology* **98** (15), 2792–2799. <https://doi.org/10.1016/j.biortech.2006.05.011>.
- Peng, X., Yang, P., Dai, K., Chen, Y., Chen, X., Zhuang, W., Ying, H. & Wu, J. 2020 Synthesis, adsorption and molecular simulation study of methylamine-modified hyper-cross-linked resins for efficient removal of citric acid from aqueous solution. *Scientific Reports* **10** (1), 9623. <https://doi.org/10.1038/s41598-020-66592-8>.
- Rafatullah, M., Sulaiman, O., Hashim, R. & Ahmad, A. 2010 Adsorption of methylene blue on low-cost adsorbents: a review. *Journal of Hazardous Materials* **177** (1–3), 70–80. <https://doi.org/10.1016/j.jhazmat.2009.12.047>.
- Rajasulochana, P. & Preethy, V. 2016 Comparison on efficiency of various techniques in treatment of waste and sewage water – a comprehensive review. *Resource-Efficient Technologies* **2** (4), 175–184. <https://doi.org/10.1016/j.refit.2016.09.004>.
- Ramaraju, B., Reddy, P. M. K. & Subrahmanyam, C. 2015 Low cost adsorbents from agricultural waste for removal of dyes. *Environmental Progress & Sustainable Energy* **33** (1), 38–46. <https://doi.org/10.1002/ep.11742>.
- Rápó, E., Előd Aradi, L., Szabó, Á., Posta, K., Szép, R. & Tonk, S. 2020 Adsorption of Remazol Brilliant Violet-5R textile dye from aqueous solutions by using eggshell waste biosorbent. *Scientific Reports* **10** (1), 8385. <https://doi.org/10.1038/s41598-020-65334-0>.
- Ray, S. S., Gusain, R. & Kumar, N. 2020 Classification of water contaminants. In: *Carbon Nanomaterial-Based Adsorbents for Water Purification*. Elsevier. <https://doi.org/10.1016/b978-0-12-821959-1.00002-7>.
- Robinson, T., McMullan, G., Marchant, R. & Nigam, P. 2001 Remediation of dyes in textile effluent: a critical review on current treatment technologies with a proposed alternative. *Bioresource Technology* **77** (3), 247–255. [https://doi.org/10.1016/s0960-8524\(00\)00080-8](https://doi.org/10.1016/s0960-8524(00)00080-8).
- Romdhane, D. F., Satlaoui, Y., Nasraoui, R., Charef, A. & Azouzi, R. 2020 Adsorption, modeling, thermodynamic, and kinetic studies of methyl red removal from textile-polluted water using natural and purified organic matter rich clays as low-cost adsorbent. *Journal of Chemistry* **2020**, 1–17. <https://doi.org/10.1155/2020/4376173>.
- Salleh, M. A. M., Mahmoud, D. K., Karim, W. A. W. A. & Idris, A. 2011 Cationic and anionic dye adsorption by agricultural solid wastes: a comprehensive review. *Desalination* **280** (1–3), 1–13. <https://doi.org/10.1016/j.desal.2011.07.019>.
- Santhy, K. & Selvapathy, P. 2006 Removal of reactive dyes from wastewater by adsorption on coir pith activated carbon. *Bioresource Technology* **97** (11), 1329–1336. <https://doi.org/10.1016/j.biortech.2005.05.016>.
- Saratale, R. G., Saratale, G. D., Chang, J. S. & Govindwar, S. P. 2011 Bacterial decolorization and degradation of azo dyes: a review. *Journal of the Taiwan Institute of Chemical Engineers* **42** (1), 138–157. <https://doi.org/10.1016/j.jtice.2010.06.006>.
- Sari, A., Bicer, A., Alkan, C. & Nazlı Özcan, A. 2019 Thermal energy storage characteristics of myristic acid-palmitic eutectic mixtures encapsulated in PMMA shell. *Solar Energy Materials and Solar Cells* **193**, 1–6. <https://doi.org/10.1016/J.SOLMAT.2019.01.003>.
- Sarkar, S., Banerjee, A., Halder, U., Biswas, R. & Bandopadhyay, R. 2017 Degradation of synthetic azo dyes of textile industry: a sustainable approach using microbial enzymes. *Water Conservation Science and Engineering* **2** (4), 121–131. <https://doi.org/10.1007/s41101-017-0031-5>.
- Senthil Kumar, P., Palaniyappan, M., Priyadharshini, M., Vignesh, A. M., Thanjiappan, A., Sebastina Anne Fernando, P., Tanvir Ahmed, R. & Srinath, R. 2013 Adsorption of basic dye onto raw and surface-modified agricultural waste. *Environmental Progress & Sustainable Energy* **33** (1), 87–98. <https://doi.org/10.1002/ep.11756>.
- Shikuku, V. O., Zanella, R., Kowenje, C. O., Donato, F. F., Bandeira, N. M. G. & Prestes, O. D. 2018 Single and binary adsorption of sulfonamide antibiotics onto iron-modified clay: linear and nonlinear isotherms, kinetics, thermodynamics, and mechanistic studies. *Applied Water Science* **8** (6), 175. <https://doi.org/10.1007/s13201-018-0825-4>.
- Sivaraj, R., Namasivayam, C. & Kadirvelu, K. 2001 Orange peel as an adsorbent in the removal of acid violet 17 (acid dye) from aqueous solutions. *Waste Management* **21** (1), 105–110. [https://doi.org/10.1016/S0956-053X\(00\)00076-3](https://doi.org/10.1016/S0956-053X(00)00076-3).
- Skwarek, E., Bolbukh, Y., Tertykh, V. & Janusz, W. 2016 Electrokinetic properties of the pristine and oxidized MWCNT depending on the electrolyte type and concentration. *Nanoscale Research Letters* **11** (1), 166. <https://doi.org/10.1186/s11671-016-1367-z>.

- Son, D., Hai, B., Mai, V. Q., Du, D. X., Phong, N. H. & Khieu, D. Q. 2016 A study on Astrazon Black AFDL dye adsorption onto Vietnamese diatomite. *Journal of Chemistry* **2016**, 1–11. <https://doi.org/10.1155/2016/8685437>.
- Srinivasan, A. & Viraraghavan, T. 2010 Decolorization of dye wastewaters by biosorbents: a review. *Journal of Environmental Management* **91** (10), 1915–1929. <https://doi.org/10.1016/J.JENVMAN.2010.05.003>.
- Sulyman, M., Namiesnik, J. & Gierak, A. 2017 Low-cost adsorbents derived from agricultural by-products/wastes for enhancing contaminant uptakes from wastewater: a review. *Polish Journal of Environmental Studies* **26** (2), 479–510. <https://doi.org/10.15244/pjoes/66769>.
- Vakili, M., Deng, S., Shen, L., Shan, D., Liu, D. & Yu, G. 2019 Regeneration of chitosan-based adsorbents for eliminating dyes from aqueous solutions. *Separation & Purification Reviews* **48** (1), 1–13. <https://doi.org/10.1080/15422119.2017.1406860>.
- Vimonses, V., Lei, S., Jin, B., Chow, C. W. K. & Saint, C. 2009 Kinetic study and equilibrium isotherm analysis of Congo Red adsorption by clay materials. *Chemical Engineering Journal* **148** (2–3), 354–364. <https://doi.org/10.1016/J.CEJ.2008.09.009>.
- Wong, S., Ghafar, N. A., Ngadi, N., Razmi, F. A., Inuwa, I. M., Mat, R. & Amin, N. A. S. 2020 Effective removal of anionic textile dyes using adsorbent synthesized from coffee waste. *Scientific Reports* **10** (1), 2928. <https://doi.org/10.1038/s41598-020-60021-6>.
- Yadav, S., Asthana, A., Chakraborty, R., Jain, B., Singh, A. K., Carabineiro, S. A. C. & Susan, M. A. B. H. 2020 Cationic dye removal using novel magnetic/activated charcoal/ $\beta$ -cyclodextrin/alginate polymer nanocomposite. *Nanomaterials* **10** (1). <https://doi.org/10.3390/nano10010170>.
- Yagub, M. T., Sen, T. K. & Ang, H. M. 2012 Equilibrium, kinetics, and thermodynamics of methylene blue adsorption by pine tree leaves. *Water, Air, & Soil Pollution* **223** (8), 5267–5282. <https://doi.org/10.1007/s11270-012-1277-3>.
- Yu, L., Chen, J., Liang, Z., Xu, W., Chen, L. & Ye, D. 2016 Degradation of phenol using  $\text{Fe}_3\text{O}_4$ -GO nanocomposite as a heterogeneous photo-Fenton catalyst. *Separation and Purification Technology* **171**, 80–87. <https://doi.org/10.1016/J.SEPPUR.2016.07.020>.
- Zaied, B. K., Rashid, M., Nasrullah, M., Zularisam, A. W., Pant, D. & Singh, L. 2020 A comprehensive review on contaminants removal from pharmaceutical wastewater by electrocoagulation process. *Science of the Total Environment* **726**, 138095. <https://doi.org/10.1016/J.SCITOTENV.2020.138095>.
- Zhang, J., Zhou, Q. & Ou, L. 2012 Kinetic, isotherm, and thermodynamic studies of the adsorption of methyl orange from aqueous solution by chitosan/alumina composite. *Journal of Chemical & Engineering Data* **57** (2), 412–419. <https://doi.org/10.1021/je2009945>.
- Zou, W., Bai, H., Gao, S. & Li, K. 2013 Characterization of modified sawdust, kinetic and equilibrium study about methylene blue adsorption in batch mode. *Korean Journal of Chemical Engineering* **30** (1), 111–122. <https://doi.org/10.1007/s11814-012-0096-y>.

First received 10 June 2021; accepted in revised form 23 September 2021. Available online 7 October 2021
